# Supplementary material
Source: MDPI journal article supplement (https://www.mdpi.com/2076-3417/9/8/1565)
Supplement: s1 [file s1]

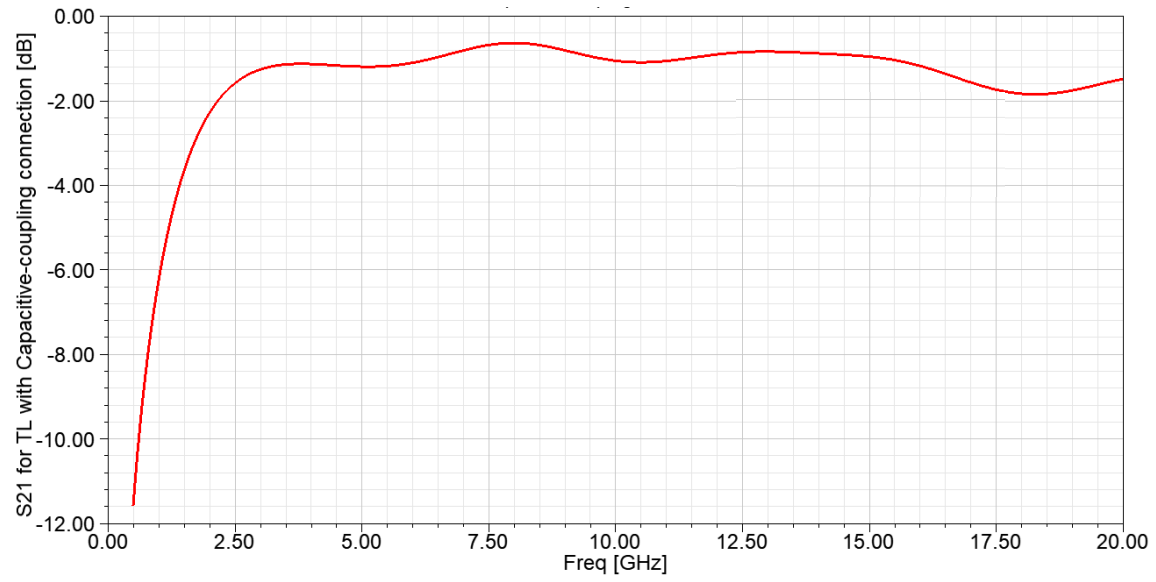

**Figure S1.** Simulation results for the insertion loss of as transmission line with a capacitive coupling.

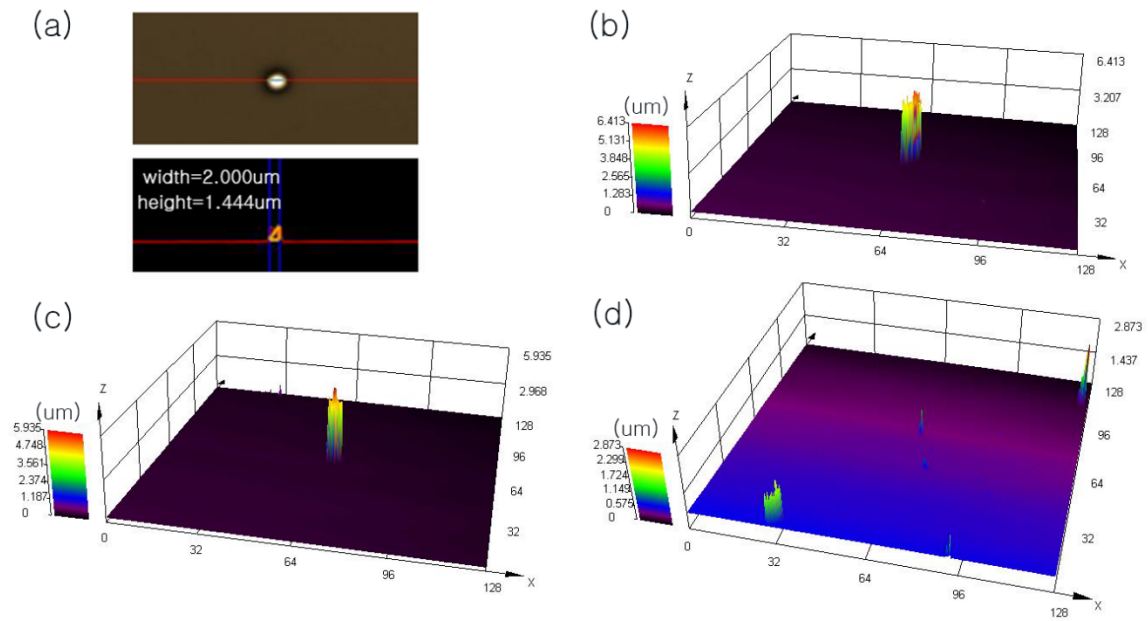

**Figure S2.** Images of the droplets sprayed at various pressures measured by a laser scanning microscope. (a) Optical image of a droplet with a width of 2.000  $\mu\text{m}$  and a height of 1.444  $\mu\text{m}$ , sprayed at a pressure of 500 kPa. Scanned images of the droplets sprayed at (b) 100kPa, (c) 300kPa, and (d) 500kPa, respectively.
